# Supplementary material for: Cell-type-specific plasticity shapes neocortical dynamics for motor learning
Source: PubMed Central journal article supplement — bioRxiv. 2023 Aug 14:2023.08.09.552699. Preprint. [Version 2] doi: 10.1101/2023.08.09.552699 (PMC10441538; doi:10.1101/2023.08.09.552699), 2023-08-14
Supplement: media-1.pdf [file media-1.pdf]

Extended Data Table. 1: Details of surgery performed for each experiment in the paper.

| Figure  | Purpose                                           | Virus                                            | Viral injection coordinates (all bilateral; unit 'mm')           | Mouse line                                        | Number of mice                           |
|---------|---------------------------------------------------|--------------------------------------------------|------------------------------------------------------------------|---------------------------------------------------|------------------------------------------|
| Fig. 1c | No paAIP2 Control                                 | N/A                                              | N/A                                                              | C57BL/6J                                          | 7 light on + 6 light off control         |
|         | paAIP2 manipulation in ALM                        | AAV2/9 CaMKII promoter-mEGFP-P2A-paAIP2 (v1)     | Bregma AP 2.5, ML $\pm$ 1.5, DV 0.4 and 0.8, 75 nl at each depth | C57BL/6J                                          | 6 light on + 7 light off control         |
|         | paAIP2 manipulation in M1                         | AAV2/9 CaMKII promoter-mEGFP-P2A-paAIP2 (v1)     | Bregma AP 2.5, ML $\pm$ 1.5, DV 0.4 and 0.8, 75 nl at each depth | C57BL/6J                                          | 4 light on                               |
| Fig. 1d | paAIP2 manipulation in ALM during cue association | AAV2/9 CaMKII promoter-mEGFP-P2A-paAIP2 (v1)     | Bregma AP 2.5, ML $\pm$ 1.5, DV 0.4 and 0.8, 75 nl at each depth | C57BL/6J                                          | 3 light on + 5 light off control         |
| Fig. 1e | Expert control, light off                         | N/A                                              | N/A                                                              | C57BL/6J or Vgat-ChR2-EYFP                        | 4 C57BL/6J + 6 Vgat-ChR2-EYFP, light off |
|         | Expert with paAIP2 manipulation in ALM, light on  | AAV2/9 CaMKII promoter-mEGFP-P2A-paAIP2 (v1)     | Bregma AP 2.5, ML $\pm$ 1.5, DV 0.4 and 0.8, 75 nl at each depth | C57BL/6J                                          | 4 light on                               |
| Fig. 1f | Control for CaMKII $\alpha$ conditional knockout  | AAV2/5 hsyn promoter-cre (v4)                    | Bregma AP 2.5, ML $\pm$ 1.5, DV 0.8, 110 nl                      | Wildtype littermates of CaMKII $\alpha$ -cKO mice | 7                                        |
|         | CaMKII $\alpha$ conditional knockout in ALM       | AAV2/5 hsyn promoter-cre (v4)                    | Bregma AP 2.5, ML $\pm$ 1.5, DV 0.8, 110 nl                      | CaMKII $\alpha$ -cKO flox/flox                    | 7                                        |
| Fig 2c  | paAIP2 manipulation in ALM PT neurons             | AAV2/9 CaMKII promoter-DIO-mEGFP-P2A-paAIP2 (v3) | Bregma AP 2.5 mm, ML $\pm$ 1.5 mm, DV 0.8 mm, 110 nl             | Sim1-cre KJ18                                     | 4 light on + 5 light off control         |

|                                               |                                                        |                                                             |                                                                                                             |                                   |                                   |
|-----------------------------------------------|--------------------------------------------------------|-------------------------------------------------------------|-------------------------------------------------------------------------------------------------------------|-----------------------------------|-----------------------------------|
|                                               | paAIP2 manipulation in ALM PT <sub>upper</sub> neurons | AAVretro CamKII promoter-Cre, 50% dilution (v2) in thalamus | Bregma AP -1.5 mm, ML $\pm$ 1.0 mm, DV 3.2 mm , 100 nl                                                      | C57BL/6J                          | 11 light on + 7 light off control |
|                                               |                                                        | AAV2/9 CaMKII promoter-DIO-mEGFP-P2A-paAIP2 (v3)            | Bregma AP 2.5 mm, ML $\pm$ 1.5 mm, DV 0.4 mm and 0.8 mm, 75 nl at each depth (or 75 or 110 nl at DV 0.8 mm) |                                   |                                   |
|                                               | paAIP2 manipulation in ALM PT <sub>lower</sub> neurons | AAVretro CamKII promoter-Cre, 50% dilution (v2) in Medulla  | Bregma AP -6.65 mm, ML $\pm$ 1.25 mm, DV 4.5 mm , 200 nl                                                    | C57BL/6J                          | 6 light on + 7 light off control  |
|                                               |                                                        | AAV2/9 CaMKII promoter-DIO-mEGFP-P2A-paAIP2 (v3)            | Bregma AP 2.5 mm, ML $\pm$ 1.5 mm, DV 0.4 mm and 0.8 mm, 75 nl at each depth (or 75 or 110 nl at DV 0.8 mm) |                                   |                                   |
| paAIP2 manipulation in ALM layer 5 IT cells   | AAV2/9 CaMKII promoter-DIO-mEGFP-P2A-paAIP2 (v3)       | Bregma AP 2.5 mm, ML $\pm$ 1.5 mm, DV 0.8 mm , 110 nl       | TLx-Cre PL56                                                                                                | 10 light on + 8 light off control |                                   |
| paAIP2 manipulation in ALM layer 2/3 IT cells | AAV2/9 CaMKII promoter-DIO-mEGFP-P2A-paAIP2 (v3)       | Bregma AP 2.5 mm, ML $\pm$ 1.5 mm, DV 0.8 mm , 110 nl       | GRP-Cre KH288                                                                                               | 6 light on + 6 light off control  |                                   |
| Fig. 2e                                       | CRISPR/Cas9 KO of CaMKII $\alpha$ in ALM PT cells      | AAVretro CamKII promoter-Cre, 50% dilution (v2) in thalamus | Bregma AP -1.5 mm, ML $\pm$ 1.0 mm, DV 3.2 mm , 100 nl                                                      | LSL-Cas9                          | 9                                 |
|                                               |                                                        | AAV2/9 U6 promoter CaMKII gRNA-hsyn promoter-mScarlet (v5)  | Bregma AP 2.5 mm, ML $\pm$ 1.5 mm, DV 0.8 mm , 110 nl                                                       |                                   |                                   |

|            |                                                    |                                                             |                                                        |                         |                                  |
|------------|----------------------------------------------------|-------------------------------------------------------------|--------------------------------------------------------|-------------------------|----------------------------------|
|            | CRISPR Control in ALM PT cells                     | AAVretro CamKII promoter-Cre, 50% dilution (v2) in thalamus | Bregma AP -1.5 mm, ML $\pm$ 1.0 mm, DV 3.2 mm , 100 nl | LSL-Cas9                | 8                                |
|            |                                                    | AAV2/1 hSyn promoter-mScarlet (v6)                          | Bregma AP 2.5 mm, ML $\pm$ 1.5 mm, DV 0.8 mm , 110 nl  |                         |                                  |
|            | CRISPR/Cas9 KO of CaMKII $\alpha$ in ALM IT cells  | AAV2/9 U6 promoter CaMKII gRNA-hsyn promoter-mScarlet (v5)  | Bregma AP 2.5 mm, ML $\pm$ 1.5 mm, DV 0.8 mm , 110 nl  | TLx-Cre PL56 x LSL-Cas9 | 6                                |
|            | CRISPR Control in ALM IT cells                     | AAV2/1 hSyn promoter-mScarlet (v6)                          | Bregma AP 2.5 mm, ML $\pm$ 1.5 mm, DV 0.8 mm , 110 nl  | TLx-Cre PL56 x LSL-Cas9 | 6                                |
| Fig. 2f    | Cofilin-SuperNova in ALM PT <sub>upper</sub> cells | AAVretro CamKII promoter-Cre, 50% dilution (v2) in thalamus | Bregma AP -1.5 mm, ML $\pm$ 1.0 mm, DV 3.2 mm , 100 nl | C57BL/6J                | 6 light on + 7 light off control |
|            |                                                    | AAV2/9 Efla promoter-DIO-CFL-SN (v7)                        | Bregma AP 2.5 mm, ML $\pm$ 1.5 mm, DV 0.8 mm , 110 nl  |                         |                                  |
|            | Supernova-Control in ALM PT <sub>upper</sub> cells | AAVretro CamKII promoter-Cre, 50% dilution (v2) in thalamus | Bregma AP -1.5 mm, ML $\pm$ 1.0 mm, DV 3.2 mm , 100 nl | C57BL/6J                | 6 light on                       |
|            |                                                    | AAV2/9 Efla promoter-DIO-SN (v8)                            | Bregma AP 2.5 mm, ML $\pm$ 1.5 mm, DV 0.8 mm , 110 nl  |                         |                                  |
|            | Cofilin-SuperNova in ALM IT cells                  | AAV2/9 Efla promoter-DIO-CFL-SN (v7)                        | Bregma AP 2.5 mm, ML $\pm$ 1.5 mm, DV 0.8 mm , 110 nl  | TLx-Cre PL56            | 7 light on + 7 light off control |
| Supernova- | AAV2/9 Efla                                        | Bregma AP                                                   | TLx-Cre PL56                                           | 5 light on              |                                  |

|                                                  |                                                                                       |                                                             |                                                          |                                         |                                          |
|--------------------------------------------------|---------------------------------------------------------------------------------------|-------------------------------------------------------------|----------------------------------------------------------|-----------------------------------------|------------------------------------------|
|                                                  | Control in ALM IT cells                                                               | promoter-DIO-SN (v8)                                        | 2.5mm, ML $\pm$ 1.5mm, DV 0.8mm , 110 nl                 |                                         |                                          |
| Fig 3 and 4                                      | Recording during learning                                                             | N/A                                                         | N/A                                                      | C57BL/6J                                | 6 light on + 2 light off                 |
|                                                  | Recording in expert mice                                                              | N/A                                                         | N/A                                                      | C57BL/6J or Vgat-ChR2-EYFP              | 4 C57BL/6J + 6 Vgat-ChR2-EYFP, light off |
|                                                  | Recording during learning with paAIP2 manipulation in ALM PT <sup>upper</sup> neurons | AAVretro CamKII promoter-Cre, 50% dilution (v2) in thalamus | Bregma AP -1.5 mm, ML $\pm$ 1.0 mm, DV 3.2 mm , 100 nl   | C57BL/6J                                | 5 light on                               |
|                                                  |                                                                                       | AAV2/9 CaMKII promoter-DIO-mEGFP-P2A-paAIP2 (v3)            | Bregma AP 2.5 mm, ML $\pm$ 1.5 mm, DV 0.8 mm, 110 nl     |                                         |                                          |
|                                                  | Recording during learning with paAIP2 manipulation in ALM PT <sup>lower</sup> neurons | AAVretro CamKII promoter-Cre, 50% dilution (v2) in Medulla  | Bregma AP -6.65 mm, ML $\pm$ 1.25 mm, DV 4.5 mm , 200 nl | C57BL/6J                                | 7 light on                               |
| AAV2/9 CaMKII promoter-DIO-mEGFP-P2A-paAIP2 (v3) |                                                                                       | Bregma AP 2.5 mm, ML $\pm$ 1.5 mm, DV 0.8 mm, 110 nl        |                                                          |                                         |                                          |
| EDF. 2                                           | Acute slice recording of ALM PT <sup>upper</sup> neurons                              | AAVretro CamKII promoter-Cre, 50% dilution (v2) in thalamus | Bregma AP -1.5 mm, ML $\pm$ 1.0 mm, DV 3.2 mm , 100 nl   | C57BL/6J (P28 at the time of injection) | 4                                        |
|                                                  |                                                                                       | AAV2/9 CaMKII promoter-DIO-mEGFP-P2A-paAIP2 (v3)            | Bregma AP 2.5 mm, ML $\pm$ 1.5 mm, 0.8 mm, 110 nl        |                                         |                                          |
