# Supplementary material for: Cell-type-specific plasticity shapes neocortical dynamics for motor learning
Source: PubMed Central journal article supplement — bioRxiv. 2023 Aug 14:2023.08.09.552699. Preprint. [Version 2] doi: 10.1101/2023.08.09.552699 (PMC10441538; doi:10.1101/2023.08.09.552699), 2023-08-14
Supplement: media-2.pdf [file media-2.pdf]

Extended Data Table 2. A list of viruses used in this paper

|    | <b>Virus name</b>                                     | <b>Titer(vg/ml)</b> | <b>Packaging</b>   | <b>ID</b>                                                                                                                                       |
|----|-------------------------------------------------------|---------------------|--------------------|-------------------------------------------------------------------------------------------------------------------------------------------------|
| V1 | AAV2/9 CaMKII promoter-mEGFP-P2A-paAIP2               | 2.0 e13             | UNC vector core    | <a href="https://www.addgene.org/91718/">https://www.addgene.org/91718/</a><br>CaMKIIP-mEGFP-P2A-paAIP2/pAAV was a gift from Ryohei Yasuda      |
| V2 | AAVretro CamKII promoter-Cre                          | 3.0 e13             | Janelia viral core | <a href="https://www.addgene.org/182736/">https://www.addgene.org/182736/</a><br>pAAV-CamKII-Cre was a gift from Janelia Viral Tools            |
| V3 | AAV2/9 CaMKII promoter-DIO-mEGFP-P2A-paAIP2           | 5.0 e12             | NA                 | This paper                                                                                                                                      |
| V4 | AAV2/5 hsyn promoter-cre                              | 2.1 e13             | Addgene            | <a href="https://www.addgene.org/105553/">https://www.addgene.org/105553/</a><br>pENN.AAV.hSyn.Cre.WPRE.hGH was a gift from James M. Wilson     |
| V5 | AAV2/9 U6 promoter CaMKII gRNA-hsyn promoter-mScarlet | 1.4 e13             | NA                 | This paper                                                                                                                                      |
| V6 | AAV2/1 hSyn promoter-mScarlet                         | 9.5 e12             | Addgene            | <a href="https://www.addgene.org/131001/">https://www.addgene.org/131001/</a><br>pAAV-hSyn-mScarlet was a gift from Karl Deisseroth             |
| V7 | AAV2/9 Ef1a promoter-DIO-CFL-SN                       | 1.1 e13             | UNC vector core    | <a href="https://www.addgene.org/181740/">https://www.addgene.org/181740/</a><br>pAAV-EF1 $\alpha$ -DIO-CFL-SN was a gift from Yasunori Hayashi |
| V8 | AAV2/9 Ef1a promoter-DIO-SN                           | 2.6 e13             | UNC vector core    | <a href="https://www.addgene.org/181741/">https://www.addgene.org/181741/</a><br>pAAV-EF1 $\alpha$ -DIO-SN was a gift from Yasunori Hayashi     |
