# Supplementary material for: Cell-type-specific plasticity shapes neocortical dynamics for motor learning
Source: PubMed Central journal article supplement — bioRxiv. 2023 Aug 14:2023.08.09.552699. Preprint. [Version 2] doi: 10.1101/2023.08.09.552699 (PMC10441538; doi:10.1101/2023.08.09.552699), 2023-08-14
Supplement: media-3.pdf [file media-3.pdf]

|                                         |        |        |        |        |        |         |         |
|-----------------------------------------|--------|--------|--------|--------|--------|---------|---------|
| Vs. on                                  |        |        |        |        |        |         |         |
| <b>PT<sub>upper</sub></b><br>(n = 6, 6) | 0.2566 | 0.3122 | 0.0004 | 0.0080 | 0.0002 | <0.0002 | <0.0002 |
| <b>IT (layer 5)</b><br>(n = 5, 7)       | 0.0720 | 0.1274 | 0.1346 | 0.4684 | 0.8952 | 0.6826  | 0.4858  |

\*n = (mice tested in light off condition, mice tested in light on condition)

|                                         |              |              |              |              |              |              |              |
|-----------------------------------------|--------------|--------------|--------------|--------------|--------------|--------------|--------------|
| Cofilin vs unconjugated                 | <b>Day 0</b> | <b>Day 1</b> | <b>Day 2</b> | <b>Day 3</b> | <b>Day 4</b> | <b>Day 5</b> | <b>Day 6</b> |
| <b>PT<sub>upper</sub></b><br>(n = 7, 6) | 0.4672       | 0.0022       | <0.0002      | <0.0002      | <0.0002      | <0.0002      | <0.0002      |
| <b>IT (layer 5)</b><br>(n = 5, 7)       | 0.7466       | 0.5442       | 0.1732       | 0.3516       | 0.9406       | 0.7716       | 0.5476       |

\*n = (mice tested with Unconjugated-SN light on, mice tested with Cofilin-SN light on)

**EDF1g-i:** *p*-Values are based on Bootstrap comparison of the mean of CV or median of no response rate and # of trials (10000 iterations, two-sided test).  $\alpha = 0.05$  was divided by the number of comparisons for *Bonferroni* correction to identify significant changes (highlighted in orange in the table).

|                                          |              |              |              |              |
|------------------------------------------|--------------|--------------|--------------|--------------|
| <b>EDF1g: CV</b>                         | <b>Day 0</b> | <b>Day 1</b> | <b>Day 2</b> | <b>Day 3</b> |
| <b>Control</b><br>(n = 6, 7)             | 0.2720       | 0.9062       | 0.4350       | 0.8018       |
| <b>ALM</b><br>(n = 6, 6)                 | 0.1090       | 0.5972       | 0.1934       | 0.9450       |
| <b>PT (both types)</b><br>(n = 5, 4)     | 0.0602       | 0.7384       | 0.5872       | 0.6238       |
| <b>PT<sub>upper</sub></b><br>(n = 6, 10) | 0.8830       | 0.8132       | 0.9468       | 0.5734       |
| <b>PT<sub>lower</sub></b><br>(n = 6, 6)  | 0.8374       | 0.920        | 0.8216       | 0.8908       |
| <b>IT (layer 2/3)</b><br>(n = 6, 6)      | 0.3402       | 0.3398       | 0.9950       | 0.8508       |
| <b>IT (layer 5)</b><br>(n = 8, 10)       | 0.1508       | 0.8844       | 0.9240       | 0.2086       |

|                                          |              |              |              |                                |
|------------------------------------------|--------------|--------------|--------------|--------------------------------|
| <b>EDF1h: no response</b>                | <b>Day 0</b> | <b>Day 1</b> | <b>Day 2</b> | <b>Day 3</b>                   |
| <b>Control</b><br>(n = 6, 7)             | 0.4138       | 0.1396       | 0.9956       | 0.0004                         |
| <b>ALM</b><br>(n = 6, 6)                 | 0.6572       | 0.0596       | 0.5542       | 0.0002<br>(control is higher)  |
| <b>PT (both types)</b><br>(n = 5, 4)     | 0.6572       | 0.9202       | 0.8304       | <0.0002<br>(control is higher) |
| <b>PT<sub>upper</sub></b><br>(n = 6, 10) | 0.4466       | 0.4642       | 0.8148       | 0.0794                         |
| <b>PT<sub>lower</sub></b><br>(n = 6, 6)  | 0.8322       | 0.3590       | 0.1028       | 0.0004<br>(control is higher)  |

|                                     |        |        |        |        |
|-------------------------------------|--------|--------|--------|--------|
| <b>IT (layer 2/3)</b><br>(n = 6, 6) | 0.8360 | 0.8132 | 0.3160 | 0.4714 |
| <b>IT (layer 5)</b><br>(n = 8, 10)  | 0.4186 | 0.7324 | 0.4206 | 0.3476 |

| <b>EDF1i: # of trials</b>                | <b>Day 1</b> | <b>Day 2</b>                  | <b>Day 3</b> |
|------------------------------------------|--------------|-------------------------------|--------------|
| <b>Control</b><br>(n = 6, 7)             | 0.2910       | 0.0162                        | 0.0044       |
| <b>ALM</b><br>(n = 6, 6)                 | 0.9234       | 0.2462                        | 0.3582       |
| <b>PT (both types)</b><br>(n = 5, 4)     | 0.6254       | 0.5158                        | 0.1312       |
| <b>PT<sub>upper</sub></b><br>(n = 6, 10) | 0.6482       | <0.0002<br>(control is lower) | 0.0178       |
| <b>PT<sub>lower</sub></b><br>(n = 6, 6)  | 0.2678       | 0.0028<br>(control is lower)  | 0.0428       |
| <b>IT (layer 2/3)</b><br>(n = 6, 6)      | 0.0096       | 0.9254                        | 0.6798       |
| <b>IT (layer 5)</b><br>(n = 8, 10)       | 0.5308       | 0.0042                        | 0.4760       |

**EDF7a-d:** *p*-Values are based on Bootstrap comparison of mean (first lick time, CV) or median no response and # of trials) (10000 iterations, two-sided test).  $\alpha = 0.05$  was divided by the number of comparisons for *Bonferroni* correction to identify significant changes (highlighted in orange in the table).

| <b>EDF7a: first lick</b>                            | <b>Day 0</b> | <b>Day 1</b> | <b>Day 2</b> | <b>Day 3</b> |
|-----------------------------------------------------|--------------|--------------|--------------|--------------|
| <b>Control vs. PT<sub>upper</sub></b><br>(n= 10, 5) | 0.8040       | 0.8172       | 0.0008       | <0.0002      |
| <b>Control vs. PT<sub>lower</sub></b><br>(n= 10, 7) | 0.9294       | 0.0248       | <0.0002      | 0.0002       |

| <b>EDF7b: no response</b>                           | <b>Day 0</b>                                     | <b>Day 1</b> | <b>Day 2</b>                                    | <b>Day 3</b>                                    |
|-----------------------------------------------------|--------------------------------------------------|--------------|-------------------------------------------------|-------------------------------------------------|
| <b>Control vs. PT<sub>upper</sub></b><br>(n= 10, 5) | <0.0002<br>(control has higher no response rate) | 0.6384       | 0.0026<br>(control has higher no response rate) | 0.0040<br>(control has higher no response rate) |
| <b>Control vs. PT<sub>lower</sub></b><br>(n= 10, 7) | 0.6762                                           | 0.7580       | 0.2340                                          | 0.0218                                          |

| <b>EDF7c: CV</b>                                    | <b>Day 0</b> | <b>Day 1</b> | <b>Day 2</b> | <b>Day 3</b> |
|-----------------------------------------------------|--------------|--------------|--------------|--------------|
| <b>Control vs. PT<sub>upper</sub></b><br>(n= 10, 5) | 0.5490       | 0.2708       | 0.4740       | 0.0496       |
| <b>Control vs. PT<sub>lower</sub></b><br>(n= 10, 7) | 0.0952       | 0.7372       | 0.1084       | 0.1750       |

| EDF7d: # of trials                                  | Day 0  | Day 1  | Day 2  | Day 3  |
|-----------------------------------------------------|--------|--------|--------|--------|
| <b>Control vs. PT<sub>upper</sub></b><br>(n= 10, 5) | 0.5128 | 0.1552 | 0.3432 | 0.1544 |
| <b>Control vs. PT<sub>lower</sub></b><br>(n= 10, 7) | 0.0260 | 0.5864 | 0.3518 | 0.8964 |

**Fig.3 and 4** Number of recorded pyramidal neurons. Only preparatory cells were analyzed.

|                                         |                          | Day 1 | Day 2 | Day 3 | Expert | Sum  |
|-----------------------------------------|--------------------------|-------|-------|-------|--------|------|
| Control                                 | # of all pyramidal cells | 244   | 270   | 265   | 1064   | 1843 |
|                                         | # of preparatory cells   | 107   | 143   | 137   | 633    | 1020 |
| PT <sub>upper</sub> paAIP2 manipulation | # of all pyramidal cells | 159   | 194   | 221   | 0      | 574  |
|                                         | # of preparatory cells   | 77    | 92    | 98    | 0      | 267  |
| PT <sub>upper</sub> paAIP2 manipulation | # of all pyramidal cells | 285   | 226   | 275   | 0      | 786  |
|                                         | # of preparatory cells   | 139   | 122   | 115   | 0      | 376  |

# of all cells (across experimental conditions): 3203

# of task-modulated cells (across experimental conditions): 1613

**Fig.4b:** *p*-values comparing the increase in lick time (hierarchical bootstrap; separating two PT types in a different group, unlike in the main text).  $\alpha = 0.05$  is divided by the number of comparisons (in this case, 8) for *Bonferroni* correction. Since their trends are consistent, we have pooled PT<sub>upper</sub> and PT<sub>lower</sub> cells for the analysis shown in the main figure.

|                                       | Day 1 (within session) | Day 2 (within session) | Day 3 (within session) | Across 3 sessions |
|---------------------------------------|------------------------|------------------------|------------------------|-------------------|
| <b>Control vs. PT<sub>upper</sub></b> | 0.711                  | 0.002                  | <0.001                 | <0.001            |
| <b>Control vs. PT<sub>lower</sub></b> | 0.294                  | 0.013                  | 0.014                  | 0.003             |

**Fig.4c:** *p*-values comparing the increase in value within sessions (hierarchical bootstrap; separating two PT types in a different group, unlike in the main text):

|                                       | Day 1 (within session) | Day 2 (within session) | Day 3 (within session) | Across 3 sessions |
|---------------------------------------|------------------------|------------------------|------------------------|-------------------|
| <b>Control vs. PT<sub>upper</sub></b> | 0.648                  | 0.144                  | 0.008                  | <0.001            |
| <b>Control vs. PT<sub>lower</sub></b> | 0.301                  | 0.095                  | 0.023                  | 0.004             |

**Fig.4d:** *p*-values comparing the decrease in value within sessions (hierarchical bootstrap; separating two PT types in a different group, unlike in the main text).

|                                       | Day 1 | Day 2 | Day 3 |
|---------------------------------------|-------|-------|-------|
| <b>Control vs. PT<sub>upper</sub></b> | 0.25  | 0.003 | 0.273 |

|                                       |       |       |       |
|---------------------------------------|-------|-------|-------|
| <b>Control vs. PT<sub>lower</sub></b> | 0.349 | 0.021 | 0.512 |
|---------------------------------------|-------|-------|-------|
